# Supplementary material
Source: bioRxiv or medRxiv preprint supplement (https://medrxiv.org/highwire/filestream/78898/field_highwire_adjunct_files/1/2020.04.28.20083246-2.pdf)
Supplement: Supplementary file [file 2020.04.28.20083246-2.pdf]

**Table S2. CT findings at the first visit in cancer patients.**

|                         |     | <b>Total<br/>(n = 283)</b> | <b>Former cancer patients<br/>(n = 76)</b> | <b>Current cancer<br/>patients<br/>(n = 207)</b> |
|-------------------------|-----|----------------------------|--------------------------------------------|--------------------------------------------------|
| Ground glass opacity    | No  | 55 (19)                    | 17 (22)                                    | 38 (18)                                          |
|                         | Yes | 211 (75)                   | 54 (71)                                    | 157 (76)                                         |
|                         | NA  | 17 (6)                     | 5 (7)                                      | 12 (6)                                           |
| Reticular pattern       | No  | 206 (73)                   | 52 (68)                                    | 154 (74)                                         |
|                         | Yes | 60 (21)                    | 19 (25)                                    | 41 (20)                                          |
|                         | NA  | 17 (6)                     | 5 (7)                                      | 12 (6)                                           |
| Interstitial thickening | No  | 154 (54)                   | 41 (54)                                    | 113 (55)                                         |
|                         | Yes | 112 (40)                   | 30 (39)                                    | 82 (40)                                          |
|                         | NA  | 17 (6)                     | 5 (7)                                      | 12 (6)                                           |
| Crazy paving appearance | No  | 238 (84)                   | 60 (79)                                    | 178 (86)                                         |
|                         | Yes | 28 (10)                    | 11 (14)                                    | 17 (8)                                           |
|                         | NA  | 17 (6)                     | 5 (7)                                      | 12 (6)                                           |
| Consolidation           | No  | 195 (69)                   | 53 (70)                                    | 142 (69)                                         |
|                         | Yes | 71 (25)                    | 18 (24)                                    | 53 (26)                                          |
|                         | NA  | 17 (6)                     | 5 (7)                                      | 12 (6)                                           |
| Bronchiectasis          | No  | 242 (86)                   | 65 (86)                                    | 177 (86)                                         |
|                         | Yes | 24 (8)                     | 6 (8)                                      | 18 (9)                                           |
|                         | NA  | 17 (6)                     | 5 (7)                                      | 12 (6)                                           |
| Unilateral involvement  | No  | 227 (80)                   | 62 (82)                                    | 165 (80)                                         |
|                         | Yes | 38 (13)                    | 9 (12)                                     | 29 (14)                                          |
|                         | NA  | 18 (6)                     | 5 (7)                                      | 13 (6)                                           |
| Bilateral involvement   | No  | 46 (16)                    | 11 (14)                                    | 35 (17)                                          |
|                         | Yes | 220 (78)                   | 60 (79)                                    | 160 (77)                                         |
|                         | NA  | 17 (6)                     | 5 (7)                                      | 12 (6)                                           |
| Localized pattern       | No  | 236 (83)                   | 67 (88)                                    | 169 (82)                                         |
|                         | Yes | 29 (10)                    | 4 (5)                                      | 25 (12)                                          |
|                         | NA  | 18 (6)                     | 5 (7)                                      | 13 (6)                                           |
| Multicentric pattern    | No  | 78 (28)                    | 22 (29)                                    | 56 (27)                                          |
|                         | Yes | 188 (66)                   | 49 (64)                                    | 139 (67)                                         |
|                         | NA  | 17 (6)                     | 5 (7)                                      | 12 (6)                                           |

Data are n (%). NA=not applicable.
